# Supplementary material
Source: ML conference proceedings conference paper supplement (https://openaccess.thecvf.com/content/CVPR2024/html/Haydarov_Adversarial_Text_to_CVPR_2024_paper.html)
Supplement: Supplementary file 1 [file Haydarov_Adversarial_Text_to_CVPR_2024_supplemental.pdf]

# Adversarial Text to Continuous Image Generation

## Supplemental Material

Kilichbek Haydarov      Aashiq Muhamed      Xiaoqian Shen      Jovana Lazarevic

Ivan Skorokhodov      Chamuditha Jayanga Galappaththige      Mohamed Elhoseiny

{first\_name.last\_name}@kaust.edu.sa

King Abdullah University of Science and Technology

### Contents

|                                              |   |
|----------------------------------------------|---|
| 1. Experiment Details                        | 1 |
| 2. Inference, FLOPs and Memory Footprint     | 1 |
| 3. Out-of-the-box Superresolution Generation | 2 |
| 4. More qualitative results                  | 2 |

### 1. Experiment Details

| Dataset | #train | #validation | caption/image |
|---------|--------|-------------|---------------|
| MS-COCO | 82k    | 40k         | 5             |
| CUB     | 9k     | 3k          | 10            |
| ArtEmis | 60k    | 8k          | 5             |

Table 1. **Statistics of datasets.** The last column indicates the ratio of captions vs images.

**Datasets.** The statistics of datasets used to train the models are summarized in Table 1.

**Hyper-parameters.** In all our experiments, we set the hyper-parameters to predefined values:  $\gamma = 5$ ,  $\lambda = 10$  and  $\tau = 0.5$  in loss functions. The rank hyper-parameter was fixed to value 5 for the INR backbone.

**Implementation Details.** Our models are trained with a learning rate  $lr = 0.0025$  with multi-GPU support on 4 NVIDIA TESLA V100 GPUs. For all experiments, we kept the batch size equal to 16 and run for 25k iterations. Figure 1 shows the numpy-like pseudocode for the core implementation of our method.

### 2. Inference, FLOPs and Memory Footprint

We provide additional stats about our proposed model in terms of Inference time (Inf. time), FLOPs, Memory footprint (Mem. Foot.) and compare them against other models. Table 2 shows that in terms of inference time our INR-based method is comparable to other methods. In our backbone, pixel generation is conducted independently, enabling a single forward pass through a Multi-Layer Perceptron (MLP) to evaluate RGB values for all pixels simultaneously. This parallel processing significantly mitigates concerns about latency in our HyperCGAN models. In the context of FLOPs, we are referring to

```

1 def tensor_modulation_word(weight: Tensor, factors: Tensor):
2     """
3     Tensor modulation for word-level attention.
4
5     Args:
6         weight: [batch_size, c_out, c_in] - original weight
7         factors: [batch_size, num_words, c_out + c_in]
8     Returns:
9         M: [batch_size, c_out, c_in] - modulating weight
10    """
11
12    b, c_out, c_in = weight.shape
13    n_words = factors.shape[1]
14
15    # Perform low-rank decomposition
16    M = factors[:, :, :c_out].view(b, n_words, c_out, 1) \
17        * factors[:, :, c_out:].view(b, n_words, 1, c_in) # [batch_size, num_words, c_out, c_in]
18
19    # Compute attention
20    M = M.view(b, n_words, -1) # [batch_size, num_words, c_out * c_in]
21    weight = weight.view(b, 1, -1) # [batch_size, 1, c_out * c_in]
22    score = torch.bmm(weight, M.transpose(1,2)) / np.sqrt(c_out * c_in) # [batch_size, 1, num_words]
23    attn = F.softmax(score, -1) # [batch_size, 1, num_words]
24    M = torch.bmm(attn, M) # [batch_size, 1, c_out * c_in]
25    M = M.view(b, c_out, c_in) # [batch_size, c_out, c_in]
26
27    M = M / M.norm(float('inf'), dim=[1, 2], keepdim=True)
28
29    return M

```

Figure 1. Numpy-like pseudocode for word-level modulation mechanism

| Method     | Inf. time (sec) | FLOPs  | Mem. Foot. (GB) |
|------------|-----------------|--------|-----------------|
| AttnGAN    | 0.016           | 261.73 | 1.18            |
| ControlGAN | 0.027           | 491.8  | 1.31            |
| DM-GAN     | 0.017           | 261.9  | 1.18            |
| DF-GAN     | 0.008           | 15.02  | 0.92            |
| Lafite     | 0.02            | 90.28  | 1.29            |
| VQ-Diff    | 9.83            | 569.5  | 3.13            |
| HyperCGAN  | 0.019           | 11.93  | 1.24            |

Table 2. Additional stats in terms of Inference time, FLOPs and Memory Footprint. In our backbone, pixel generation is conducted independently, enabling a single forward pass through a Multi-Layer Perceptron (MLP) to evaluate RGB values for all pixels simultaneously. This parallel processing significantly mitigates concerns about latency in our HyperCGAN model.

”Floating Point Operations,” representing the total number of floating-point operations required for a single forward pass. A higher FLOPs count typically correlates with slower model performance and lower throughput. To quantify FLOPs, we employed the DeepSpeed FLOPs profiler for all the models discussed below. Furthermore, in assessing memory footprint, we considered the memory space occupied by the model’s tensors and reported the estimated GPU memory consumption after model initialization. These measurements were consistently conducted on the V100 with 32GB memory.

### 3. Out-of-the-box Superresolution Generation

In this setting, we conduct out-of-the-box generation in a training efficiency manner naturally inherited from INR-based model. We first train our model on downsampled images ( $128 \times 128$ ) and perform  $256 \times 256$  generation during inference either with classical interpolation methods or taking advantage of INR-based model’s merits. This means our model can generate higher resolution images without modifying any architecture or finetuning, by just adjusting to a more denser coordinate grid. Table 3 show that our model outperforms standard upsampling techniques on all datasets. See Figure 2 for qualitative results.

### 4. More qualitative results

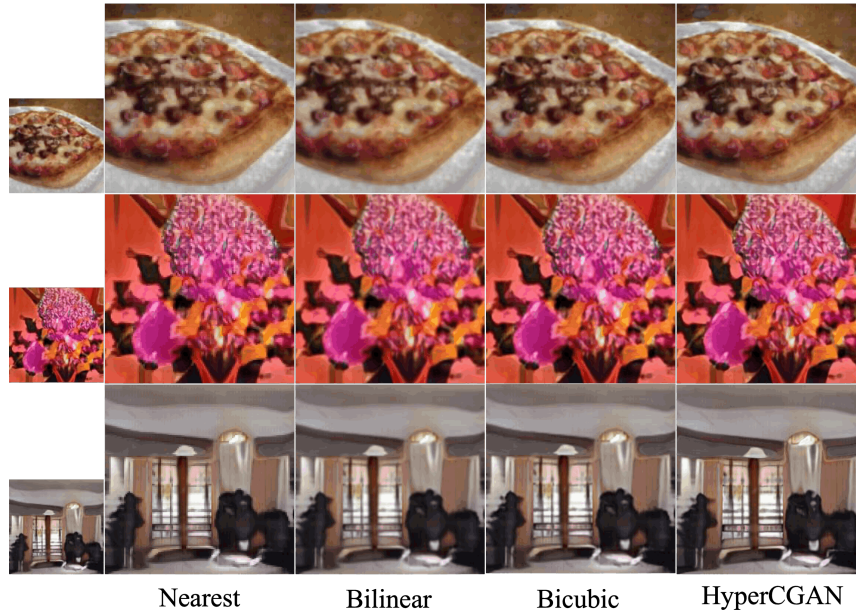

Figure 2. Qualitative comparison between classical interpolation techniques and our model.

| Methods   | COCO 256 <sup>2</sup> | ArtEmis 256 <sup>2</sup> | CUB 256 <sup>2</sup> |
|-----------|-----------------------|--------------------------|----------------------|
| Nearest   | 30.86                 | 26.87                    | 17.69                |
| Bilinear  | 29.84                 | 28.06                    | 16.84                |
| Bicubic   | 28.73                 | 26.52                    | 16.18                |
| HyperCGAN | <b>27.61</b>          | <b>23.78</b>             | <b>15.42</b>         |

Table 3. Super-resolution Synthesis comparison on FID scores. In this setting, we trained models on downsampled 128<sup>2</sup> images and generate 256<sup>2</sup> resolution images without changing architecture or finetuning.

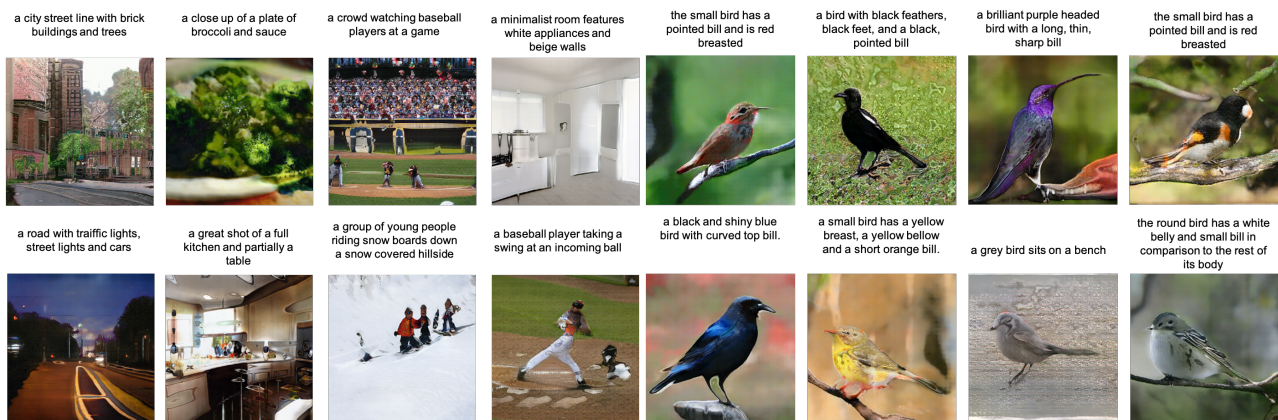

Figure 3. More Qualitative Results of HyperCGAN on COCO and CUB datasets with resolution of 256<sup>2</sup>.

all of their hats look like different flavors of macaroons to me.

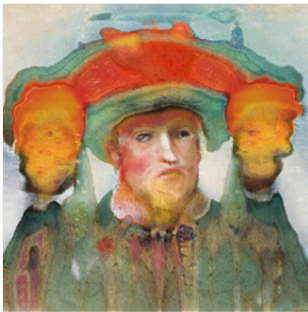

ominous landscape and structure setting. hard to tell the time of day which draws you in

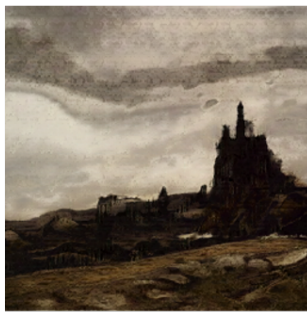

the sculpture is very nicely built and the gray color is nice

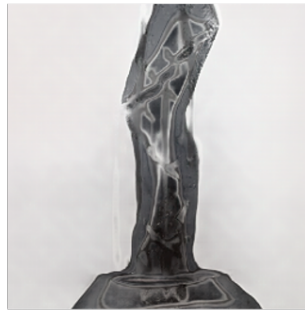

this scene of warfare is a reminder of the evils men will commit in the name of trivial things.

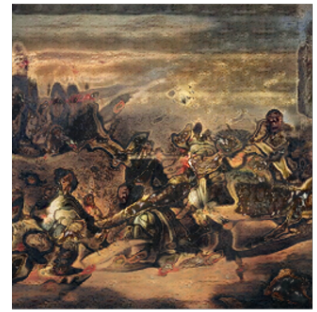

the blending of the colors and strokes reveal a lot of emotion, but hides many details, a feature i really admire.

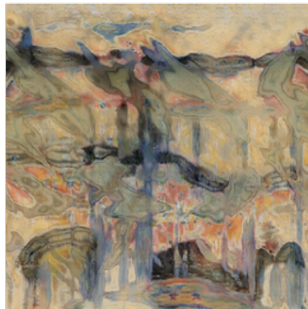

the bold cheerful colors make me happy.

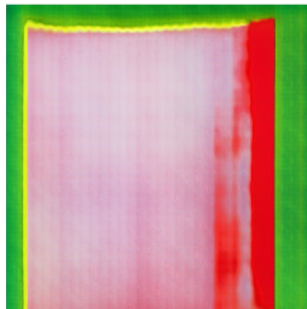

this lady's eyes look like they have red in them like she is sort of evil.

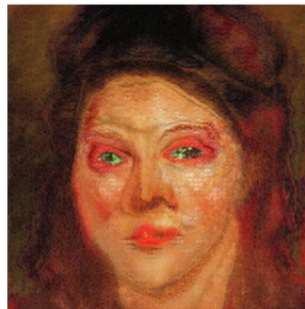

i really enjoy the pastel colors used to make a light spring feeling.

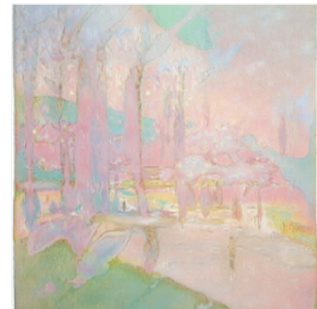

Figure 4. More Qualitative Results of HyperCGAN on ArtEmis.

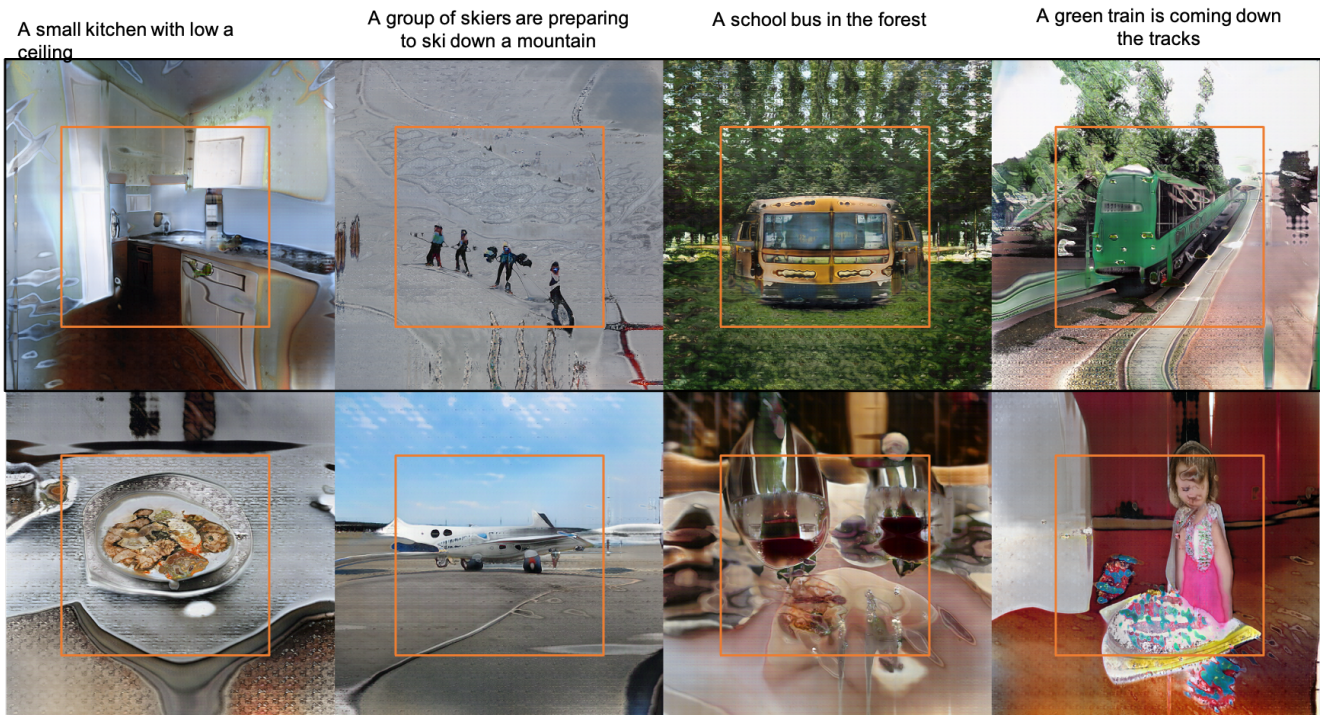

Figure 5. Extrapolation results of HyperCGAN on COCO with input coordinate range  $[-1.25, -1.25]$

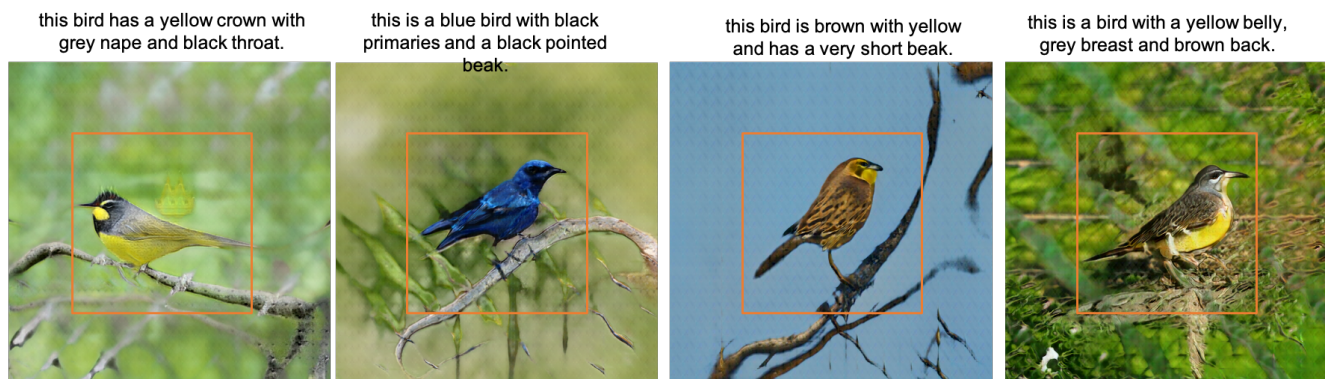

Figure 6. Extrapolation results of HyperCGAN on COCO with input coordinate range  $[-1.5, -1.5]$

A small kitchen with low a ceiling

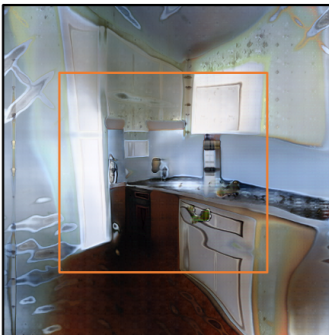

A group of skiers are preparing to ski down a mountain

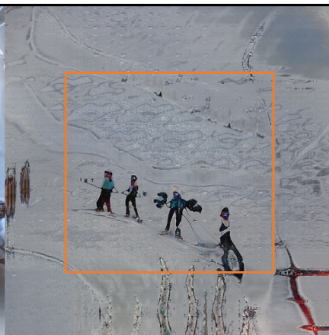

A school bus in the forest

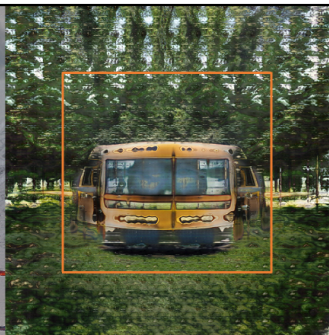

A green train is coming down the tracks

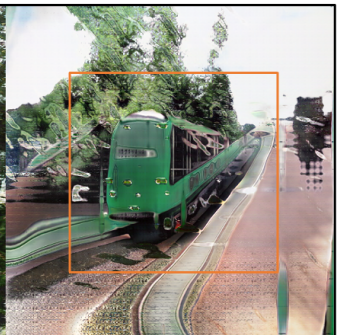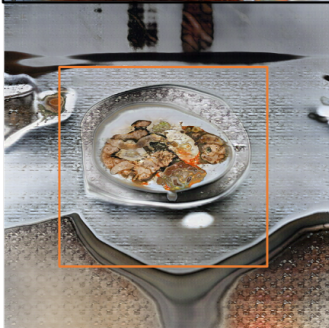

very cooked food on a grey plate on a wooden table

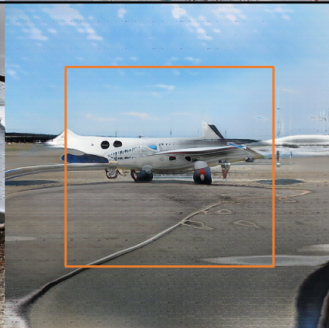

airplane that is parked on a concrete runway

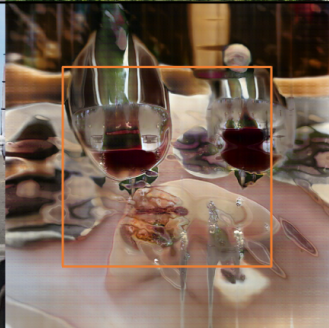

a couple of glasses of wine sitting on a table of food

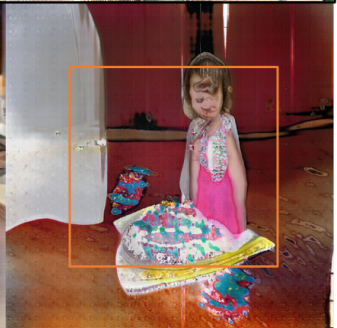

a young girl standing in front of a birthday cake

Figure 7. More Qualitative Results of HyperCGAN on Superresolution: model trained on  $256^2$  resolution and image synthesis is done on  $1024^2$ .
